# Supplementary material
Source: publisher figshare collection journal article supplement (https://tandf.figshare.com/ndownloader/files/22449902)

**Figure S1.**


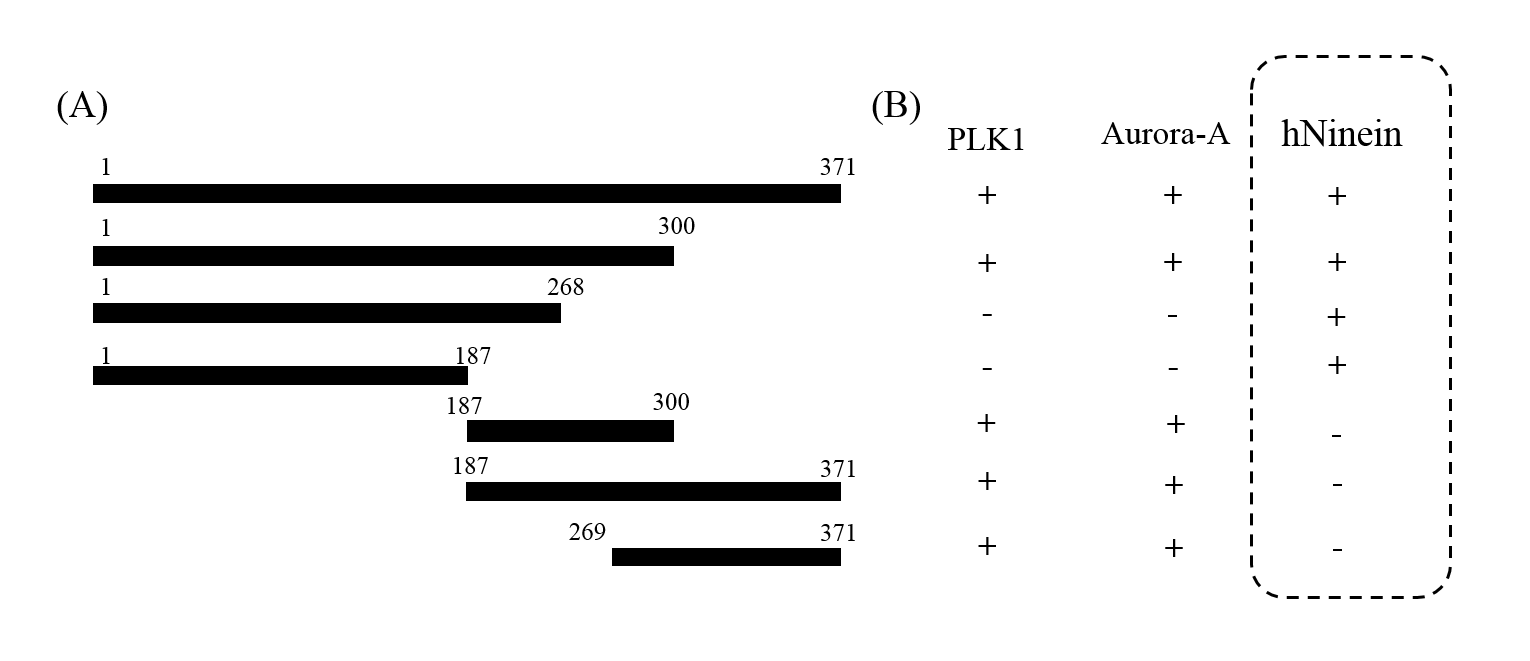


**Figure S2.**


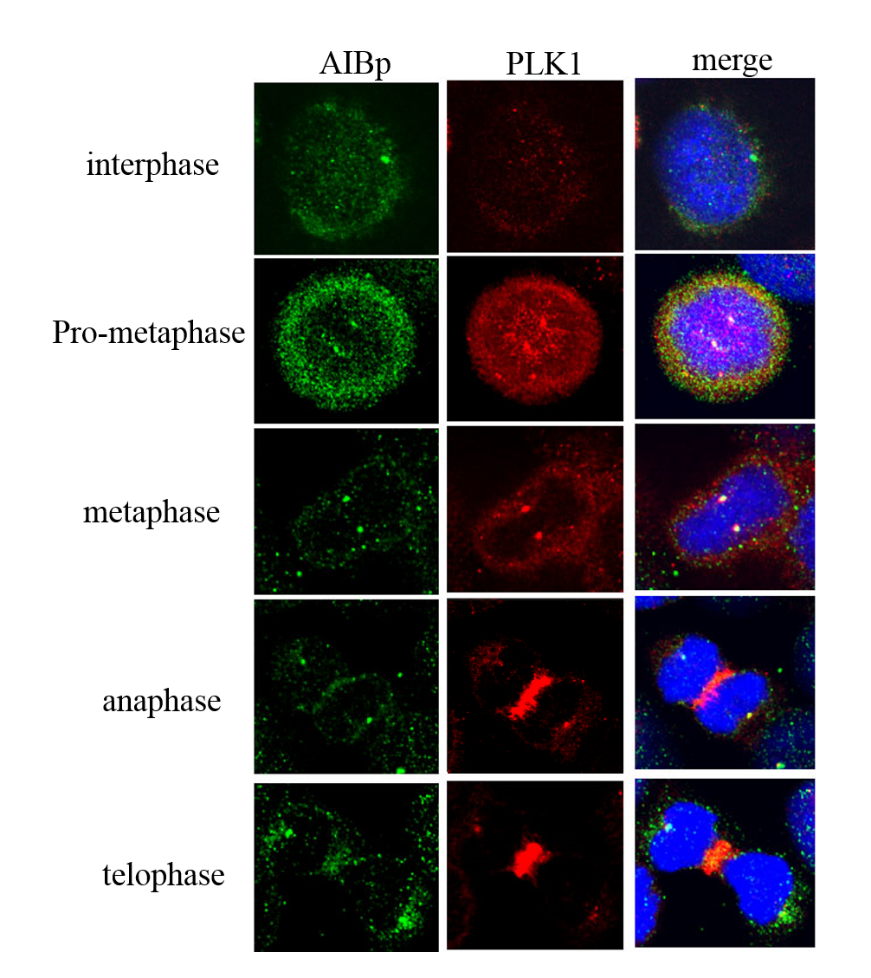


**Figure S3.**


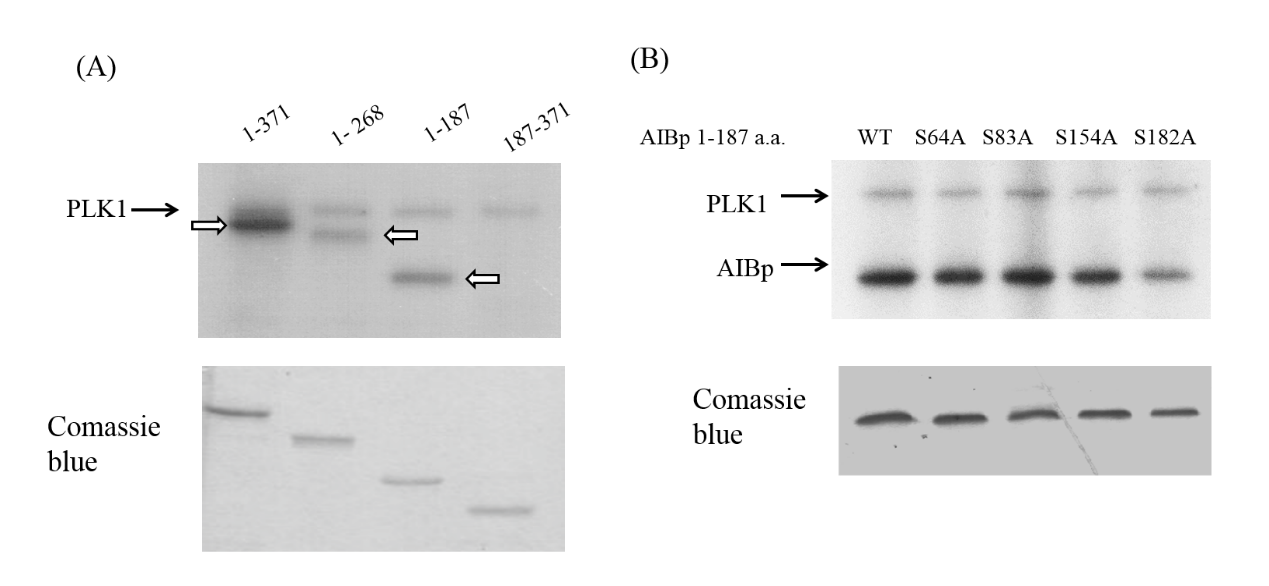

Supplement: Supplementary file 1 [file 22449902]
